# Supplementary figures and images for: Family Planning Vouchers in Low and Middle Income Countries: A Systematic Review
Source: PubMed Central journal article supplement — Stud Fam Plann. 2016 Nov 17;47(4):357–70. doi: 10.1111/sifp.12006 (PMC5434952; doi:10.1111/sifp.12006), 2016-11-17

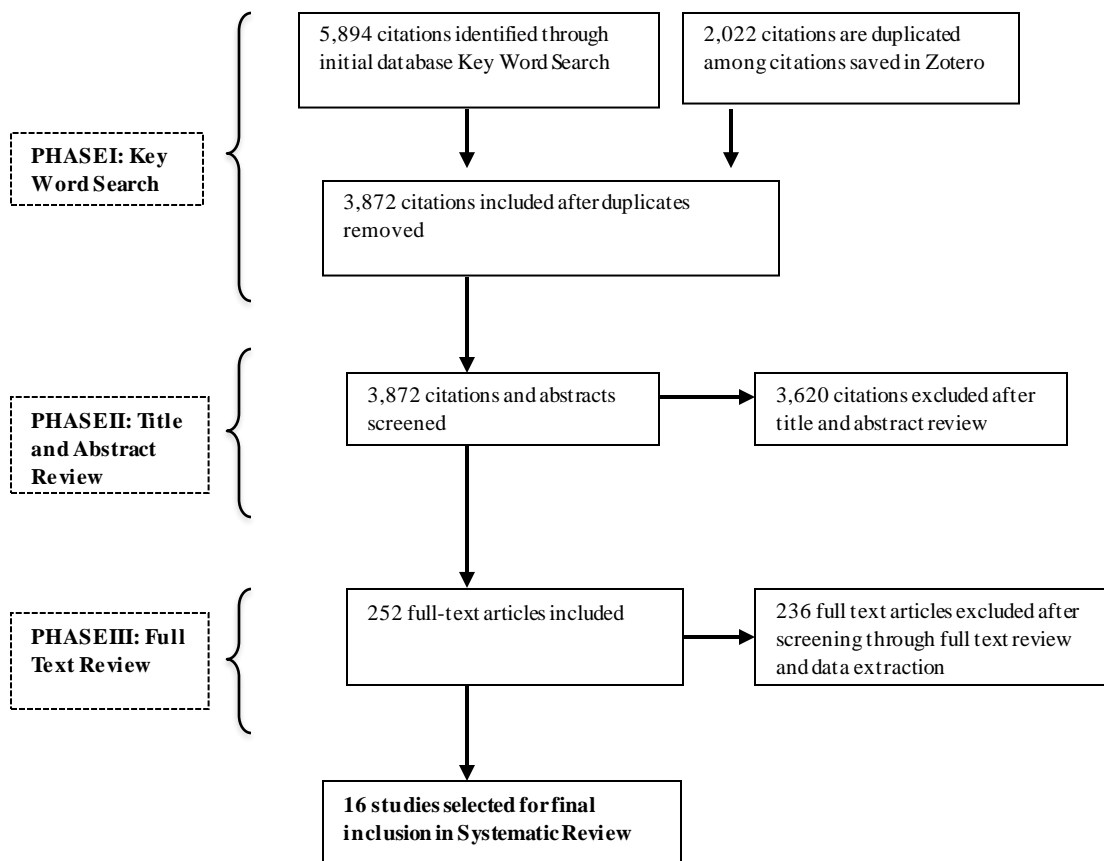

Supplement: SIFP-47-357-s002.pdf [file SIFP-47-357-s002.pdf]
